# Supplementary material
Source: publisher site journal article supplement (https://www.kjim.org/upload/media/kjim-2022-401-Supplementary-Fig-6.pdf)
Supplement: Supplementary file 1 [file kjim-2022-401-Supplementary-Fig-6.pdf]

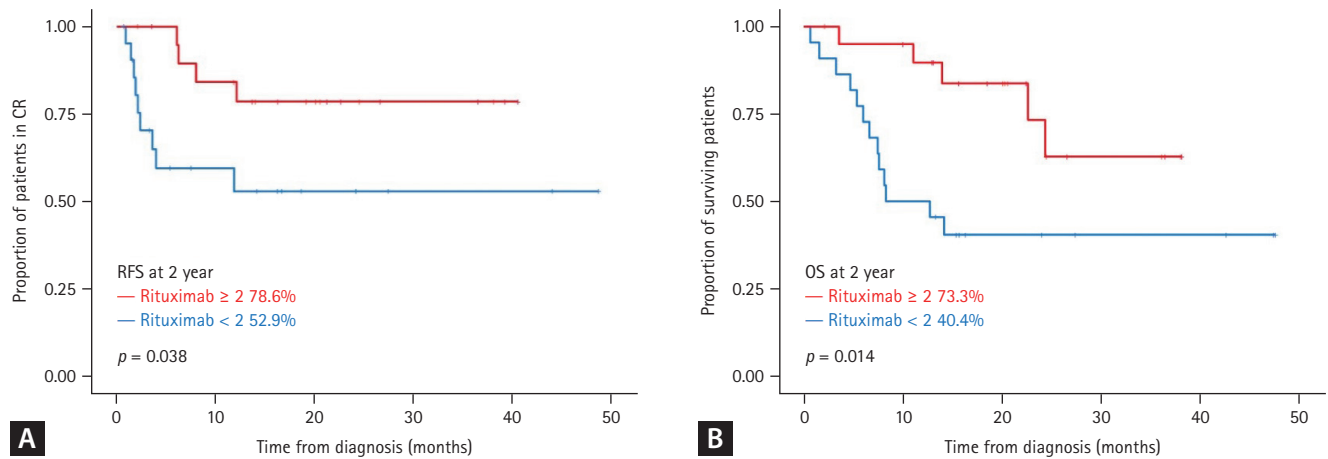

**Supplementary Figure 6.** Comparison of outcomes according to the number of rituximab cycles administered after transplantation. Patients who were administered  $\geq 2$  cycles of rituximab after transplantation experienced significantly improved relapse-free survival (RFS) (A) and overall survival (OS) (B) compared to patients who received  $< 2$  cycles of rituximab. CR, complete remission.
